# Supplementary material for: Impact of long‐term administration of maralixibat on children with cholestasis secondary to Alagille syndrome
Source: PubMed Central journal article supplement — Hepatol Commun. 2022 Jun 7;6(8):1922–33. doi: 10.1002/hep4.1992 (PMC9315125; doi:10.1002/hep4.1992), 2022-06-07
Supplement: HEP4-6-1922-s003.pdf [file HEP4-6-1922-s003.pdf]

**Supplemental Table 1. Dosing Regimens for Double-Blind and Extension Studies**

| ITCH               |                                                          |               | IMAGINE II                                                                                                |                                                                         |                  |                                              |                                                                 |                                                                                   |
|--------------------|----------------------------------------------------------|---------------|-----------------------------------------------------------------------------------------------------------|-------------------------------------------------------------------------|------------------|----------------------------------------------|-----------------------------------------------------------------|-----------------------------------------------------------------------------------|
| Screening          | Double-blind placebo-controlled                          |               | Blinded extension study with Maralixibat dosing                                                           |                                                                         |                  |                                              |                                                                 |                                                                                   |
| Eligibility ItchRO | Dose escalation:<br>Placebo vs 70, 140 or<br>280 ug/kg/d | Stable dosing | Blinded Dose<br>Escalation: placebo<br>escalated to 140<br>ug/kg/d; active remain<br>on double-blind dose | Dose optimization<br>based on efficacy to<br>max dose of 280<br>ug/kg/d | Stable<br>dosing | Reconsent to<br>extension at current<br>dose | Reconsent to optional<br>long-term follow-up at<br>current dose | Reconsent to<br>additional<br>optional long-<br>term follow-up at<br>current dose |

  

| IMAGO              |                                                                           |               | IMAGINE                                                                                                   |                                                                         |               |                                                              |                                                                                                                                      |  |
|--------------------|---------------------------------------------------------------------------|---------------|-----------------------------------------------------------------------------------------------------------|-------------------------------------------------------------------------|---------------|--------------------------------------------------------------|--------------------------------------------------------------------------------------------------------------------------------------|--|
| Screening          | Double-blind placebo-controlled                                           |               | Blinded extension study with Maralixibat dosing                                                           |                                                                         |               |                                                              |                                                                                                                                      |  |
| Eligibility ItchRO | Dose escalation:<br>Placebo vs 140 <sup>1</sup> or (70<br>or 280) ug/kg/d | Stable dosing | Blinded Dose<br>Escalation: placebo<br>escalated to 140<br>ug/kg/d; active remain<br>on double-blind dose | Dose optimization<br>based on efficacy to<br>max dose of 280<br>ug/kg/d | Stable dosing | Reconsent to optional long-term<br>follow-up at current dose | Reconsent to optional long-term follow-up<br>with possibility to increase to BID dosing<br>(560 ug/kg/d) after week 156 <sup>2</sup> |  |

Week -17    -14    -13            -7            1            5            13    48    72    96    124    144            220    288<sup>3</sup>

<sup>1</sup>140 dosing completed in first 6 participants; 70 or 280 chosen based upon tolerability of first cohort

Per protocol:

The study will be opened with enrollment in Cohort A:

- Cohort A: 140 µg/kg/day LUM001 (n=6) or placebo (n=3).
- Cohort B: 70 or 280 µg/kg/day LUM001 (n=6) or placebo (n=3).

<sup>2</sup>Participant's start of the 560 ug/kg/d is variable

<sup>3</sup>There was no protocol prescribed maximum duration for IMAGINE. The study ended when study MRX-800 began that allowed enrollment of previously maralixibat-treated Alagille syndrome patients.

**Supplemental Table 2A. Disease-Specific Inclusion Criteria for IMAGO and ITCH.**

| ITCH                                                                                                                                                                                                                                     | IMAGO                                                                                         |
|------------------------------------------------------------------------------------------------------------------------------------------------------------------------------------------------------------------------------------------|-----------------------------------------------------------------------------------------------|
| 1. Male or female subjects between the ages of 2 and 18 years inclusive                                                                                                                                                                  | 1. Male or female, 2 – 18 years of age                                                        |
| 2. Diagnosis of ALGS based on the diagnostic criteria outlined in Section 16.3 (as published)                                                                                                                                            | 2. Diagnosis of ALGS based on the diagnostic criteria outlined in Section 16.3 (as published) |
| 3. Evidence of cholestasis (one or more of the following):<br>a. Fasting total serum bile acid > 3x ULN for age<br>b. Direct bilirubin > 1 mg/dL<br>c. Fat soluble vitamin deficiency otherwise unexplainable<br>d. GGT > 3x ULN for age | 3. Cholestasis as evidenced by total serum bile acid > 3x upper limit of normal (ULN) for age |
|                                                                                                                                                                                                                                          | 4. Intractable pruritus explainable only by liver disease                                     |
| 4. Average daily score $\geq$ 2 on the Itch Reported Outcome (ItchRO™) questionnaire                                                                                                                                                     | 5. Average daily score $\geq$ 2 on the Itch Reported Outcome (ItchRO™) questionnaire          |
|                                                                                                                                                                                                                                          | 6. Native liver                                                                               |

**Supplemental Table 2B. Disease-Specific Exclusion Criteria for IMAGO and ITCH.**

| ITCH                                                                                                                                                                                                                                                         | IMAGO                                                                                                                                                                                                                               |
|--------------------------------------------------------------------------------------------------------------------------------------------------------------------------------------------------------------------------------------------------------------|-------------------------------------------------------------------------------------------------------------------------------------------------------------------------------------------------------------------------------------|
| 1. Chronic diarrhea requiring ongoing specific intravenous fluid or nutritional intervention for the diarrhea and/or its sequelae                                                                                                                            | 1. Chronic diarrhoea requiring specific intravenous fluid or nutritional intervention for the diarrhoea and/or its sequelae                                                                                                         |
| 2. Surgical interruption of the enterohepatic circulation                                                                                                                                                                                                    | 2. Surgical disruption of the enterohepatic circulation                                                                                                                                                                             |
| 3. Liver transplant                                                                                                                                                                                                                                          | 3. Liver transplant                                                                                                                                                                                                                 |
| 4. ALT >15 x ULN                                                                                                                                                                                                                                             | 5. ALT or AST > 15 x ULN at screening                                                                                                                                                                                               |
| 5. Decompensated cirrhosis [INR > 1.5 (unresponsive to vitamin K therapy), albumin < 3.0 gm/dL, history or presence of clinically significant ascites, variceal hemorrhage, and/or encephalopathy] with the subject participating in or completing the study | 4. Decompensated cirrhosis [international normalized ratio (INR) > 1.5 albumen < 30 g/L, history or presence of clinically significant ascites, variceal hemorrhage, and/or encephalopathy]                                         |
| 6. History or presence of other concomitant liver disease                                                                                                                                                                                                    | 6. History or presence of other concomitant liver disease                                                                                                                                                                           |
| 7. History or presence of any other disease or condition known to interfere with the absorption, distribution, metabolism or excretion of drugs, including bile salt metabolism in the intestine (e.g., inflammatory bowel disease)                          | 7. History or presence of any other disease or condition known to interfere with the absorption, distribution, metabolism or excretion of drugs, including bile salt metabolism in the intestine (e.g., inflammatory bowel disease) |
| 8. Any subject whose recent medical history, or current status suggests that, in the opinion of the Investigator or Medical Monitor, the subject may be unable to complete this study without interruption for intercurrent medical problems                 |                                                                                                                                                                                                                                     |
| 9. The anticipated need for a surgical procedure within 20 weeks from randomization                                                                                                                                                                          |                                                                                                                                                                                                                                     |

|                                                                                                                                                                |                                                                                                                                                                                                                          |
|----------------------------------------------------------------------------------------------------------------------------------------------------------------|--------------------------------------------------------------------------------------------------------------------------------------------------------------------------------------------------------------------------|
| 10. Administration of bile acid or lipid binding resins within 30 days prior to randomization and throughout the trial                                         | 10. Administration of bile acid or lipid binding resins within 30 days prior to randomization and throughout the trial                                                                                                   |
| 11. Any other conditions or abnormalities which, in the opinion of the Investigator or Medical Monitor, may compromise the safety of the subject, or interfere | 11. Any other conditions or abnormalities which, in the opinion of the Investigator or Medical Monitor, may compromise the safety of the subject, or interfere with the subject participating in or completing the study |

**Supplemental Table 3. Enhanced Monitoring Criteria and Stopping Guidelines.**

***Enhanced Monitoring Criteria***

| <b>Historical Baseline<sup>1</sup> ALT</b> | <b>ALT</b>                              |
|--------------------------------------------|-----------------------------------------|
| ≤ ULN                                      | > 5 x ULN                               |
| > ULN                                      | > 3 x historical baseline and > 5 x ULN |

| <b>Historical Baseline<sup>1</sup> Total Bilirubin</b> | <b>Total Bilirubin</b>                       |
|--------------------------------------------------------|----------------------------------------------|
| Total Bilirubin 1-10 mg/dL (17.10-171.04 μmol/L)       | 3 mg increase over historical baseline level |
| Total Bilirubin >10 mg/dL (> 171.04 μmol/L)            | 3 mg increase over historical baseline level |

***Stopping Guidelines***

| <b>Historical Baseline Tests</b>                 | <b>Change Observed</b>                                                  |
|--------------------------------------------------|-------------------------------------------------------------------------|
| ALT (any level)                                  | ALT ≥ 20 x ULN                                                          |
| Total Bilirubin 1-10 mg/dL (17.10-171.04 μmol/L) | 5 mg increased <b>and</b> a 2 x increase over historical baseline level |
| Total Bilirubin >10 mg/dL (> 171.04 μmol/L)      | 2 x increase over historical baseline level                             |

<sup>1</sup>Historical baseline was set by the baseline values of alanine transaminase (ALT) and total bilirubin (TB) at week -13 (i.e., baseline for ITCH or IMAGO)

**Supplemental Table 4. Demographic Characteristics by Double-Blind Study and Combined Studies.**

| Characteristics                                                          | Baseline (Week -13) |           |                  |
|--------------------------------------------------------------------------|---------------------|-----------|------------------|
|                                                                          | ITCH                | IMAGO     | COMBINED STUDIES |
| N                                                                        | 37                  | 20        | 57               |
| Age, years                                                               |                     |           |                  |
| mean (SD)                                                                | 6.8 (4.5)           | 5.9 (4.9) | 6.5 (4.6)        |
| minimum, maximum                                                         | 1, 17               | 1, 16     | 1, 17            |
| Sex, Female, n (%)                                                       | 16 (43.2)           | 10 (50.0) | 26 (45.6)        |
| Race, n (%)                                                              |                     |           |                  |
| Black                                                                    | 5 (13.5)            | 1 (5.0)   | 6 (10.5)         |
| White                                                                    | 29 (78.4)           | 17 (85.0) | 46 (80.7)        |
| Not Black or White (including missing)                                   | 3 (8.1)             | 2 (10.0)  | 5 (8.8)          |
| Ethnicity, Hispanic/Latino, n (%)                                        | 7 (18.9)            | 0 (0.0)   | 7 (12.3)         |
| Median Time on Study (weeks) <sup>1</sup>                                | 16.7                | 16.6      | 16.7             |
| # (%) of Participants with Early Termination from the Study <sup>1</sup> | 2 (5.4)             | 1 (5.0)   | 3 (5.3)          |

<sup>1</sup>Early terminations are for any reason, not just owing to AEs. SD = Standard Deviation

**Supplemental Table 5. Baseline Characteristics by Double-Blind Study and Combined Studies.**

| Characteristics                | Statistics      | Baseline            |                      |                     |
|--------------------------------|-----------------|---------------------|----------------------|---------------------|
|                                |                 | (Week -13)          |                      |                     |
|                                |                 | ITCH                | IMAGO                | COMBINED STUDIES    |
| N                              |                 | 37                  | 20                   | 57                  |
| ItchRO(Obs)                    | N               | 37                  | 20                   | 57                  |
|                                | mean (SD)       | 2.9 (0.6)           | 2.8 (0.8)            | 2.9 (0.7)           |
|                                | min, max        | 2.0, 4.0            | 1.6, 4.0             | 1.6, 4.0            |
| Clinician Scratch Scale (CSS)  | N               | 37 (0)              | 20 (0)               | 57                  |
|                                | mean (SD)       | 3.0 (1.1)           | 2.9 (0.6)            | 2.9 (0.9)           |
|                                | min, max        | 0.0, 4.0            | 2.0, 4.0             | 0.0, 4.0            |
| CSS = 0                        | n (%)           | 1 (2.7)             | 0 (0.0)              | 1 (1.8)             |
| CSS = 1                        | n (%)           | 3 (8.1)             | 0 (0.0)              | 3 (5.3)             |
| CSS = 2                        | n (%)           | 6 (16.2)            | 5 (25.0)             | 11 (19.3)           |
| CSS = 3                        | n (%)           | 13 (35.1)           | 13 (65.0)            | 26 (45.6)           |
| CSS = 4                        | n (%)           | 14 (37.8)           | 2 (10.0)             | 16 (28.1)           |
| Serum Bile Acid (umol/L)       | N               | 37                  | 20                   | 57                  |
|                                | median (Q1, Q3) | 155.5 (57.4, 310.1) | 207.3 (143.1, 348.7) | 181.1 (83.4, 329.0) |
|                                | min, max        | 10.2, 1014.2        | 29.4, 899.6          | 10.2, 1014.2        |
| PedsQL Total - Parent          | N               | 36                  | 20                   | 56                  |
|                                | mean (SD)       | 65.0 (20.1)         | 58.5 (18.6)          | 62.7 (19.7)         |
|                                | min, max        | 18.5, 96.7          | 35.9, 94.4           | 18.5, 96.7          |
| Multidimensional Fatigue Scale | N               | 33                  | 17                   | 50                  |
|                                | mean (SD)       | 61.6 (21.1)         | 52.2 (19.4)          | 58.4 (20.8)         |
|                                | min, max        | 16.7, 100.0         | 20.8, 91.7           | 16.7, 100.0         |
| Family Impact Total Scale      | N               | 35                  | 19                   | 54                  |
|                                | mean (SD)       | 63.9 (20.4)         | 56.2 (20.5)          | 61.2 (20.5)         |
|                                | min, max        | 25.7, 98.6          | 13.9, 91.7           | 13.9, 98.6          |

| Characteristics                    | Statistics      | Baseline             |                      |                      |
|------------------------------------|-----------------|----------------------|----------------------|----------------------|
|                                    |                 | (Week -13)           |                      |                      |
|                                    |                 | ITCH                 | IMAGO                | COMBINED STUDIES     |
| Total Bilirubin (mg/dL)            | N               | 37                   | 20                   | 57                   |
|                                    | median (Q1, Q3) | 2.1 (0.9, 7.2)       | 1.7 (0.9, 7.8)       | 2.1 (0.9, 7.4)       |
|                                    | min, max        | 0.3, 24.9            | 0.3, 16.7            | 0.3, 24.9            |
| Total Cholesterol (mg/dL)          | N               | 37                   | 17                   | 54                   |
|                                    | median (Q1, Q3) | 320.0 (231.0, 443.0) | 302.0 (266.0, 373.0) | 309.5 (234.0, 443.0) |
|                                    | min, max        | 138.0, 1601.0        | 158.0, 1864.0        | 138.0, 1864.0        |
| ALT (U/L)                          | N               | 37                   | 20                   | 57                   |
|                                    | median (Q1, Q3) | 137.0 (91.0, 214.0)  | 128.5 (85.0, 155.5)  | 130.0 (91.0, 189.0)  |
|                                    | min, max        | 40.0, 335.0          | 42.0, 274.0          | 40.0, 335.0          |
| AST (U/L)                          | N               | 37                   | 20                   | 57                   |
|                                    | median (Q1, Q3) | 123.0 (76.0, 205.0)  | 102.5 (77.5, 163.0)  | 120.0 (76.0, 180.0)  |
|                                    | min, max        | 43.0, 355.0          | 46.0, 289.0          | 43.0, 355.0          |
| GGT (U/L)                          | N               | 37                   | 20                   | 57                   |
|                                    | median (Q1, Q3) | 329.0 (203.0, 834.0) | 398.0 (172.5, 590.5) | 349.0 (196.0, 602.0) |
|                                    | min, max        | 19.0, 1282.0         | 130.0, 1443.0        | 19.0, 1443.0         |
| Albumin (g/dL)                     | N               | 37                   | 20                   | 57                   |
|                                    | median (Q1, Q3) | 4.6 (4.4, 4.7)       | 4.5 (4.3, 4.6)       | 4.5 (4.3, 4.7)       |
|                                    | min, max        | 3.1, 5.2             | 3.0, 5.0             | 3.0, 5.2             |
| Platelet (10 <sup>3</sup> /uL)     | N               | 37                   | 20                   | 57                   |
|                                    | median (Q1, Q3) | 258.0 (217.0, 342.0) | 318.5 (223.5, 412.5) | 267.0 (217.0, 382.0) |
|                                    | min, max        | 151.0, 638.0         | 73.0, 682.0          | 73.0, 682.0          |
| AST to platelet ratio index (APRI) | N               | 37                   | 20                   | 57                   |
|                                    | median (Q1, Q3) | 1.1 (0.7, 2.0)       | 0.7 (0.6, 1.4)       | 0.9 (0.6, 1.9)       |
|                                    | min, max        | 0.3, 5.0             | 0.4, 3.4             | 0.3, 5.0             |
| Vitamin A (µg/dL)                  | N               | 36                   | 19                   | 55                   |
|                                    | mean (SD)       | 52.5 (18.9)          | 50.4 (20.6)          | 51.7 (19.3)          |



|  |          |            |            |            |
|--|----------|------------|------------|------------|
|  | min, max | 16.0, 94.0 | 14.3, 80.2 | 14.3, 94.0 |
|--|----------|------------|------------|------------|

| Characteristics                                          | Statistics | Baseline    |             |                  |
|----------------------------------------------------------|------------|-------------|-------------|------------------|
|                                                          |            | (Week -13)  |             |                  |
|                                                          |            | ITCH        | IMAGO       | COMBINED STUDIES |
| Vitamin A insufficiency: Retinol/RBP (molar ratio <0.8)  | n (%)      | 0 (0)       | 0 (0)       | 0 (0)            |
| Vitamin D (ng/mL)                                        | N          | 36          | 18          | 54               |
|                                                          | mean (SD)  | 31.1 (14.1) | 26.8 (11.9) | 29.7 (13.5)      |
|                                                          | min, max   | 8.0, 78.0   | 4.6, 46.9   | 4.6, 78.0        |
| Vitamin D insufficiency:<br>25-Hydroxyvitamin D<20 ng/mL | n (%)      | 8 (22.2)    | 5 (27.8)    | 5 (27.8)         |
| Vitamin E (µg/mL)                                        | N          | 36          | 19          | 55               |
|                                                          | mean (SD)  | 8.1 (4.8)   | 8.5 (5.4)   | 8.3 (5.0)        |
|                                                          | min, max   | 0.5, 19.7   | 0.2, 17.7   | 0.2, 19.7        |
| Vitamin E insufficiency: Tocopherol/lipids <0.8 mg/g     | n (%)      | 0 (0)       | 5 (29.4)    | 5 (29.4)         |
| Vitamin K insufficiency: INR > 1.2                       | n (%)      | 0 (0)       | 1 (5.3)     | 1 (5.3)          |
| Any Vitamin A/D/E/K Insufficiency                        | n (%)      | 17 (47.2)   | 8 (47.1)    | 25 (47.2)        |
| Height Z-score                                           | N          | 37          | 20          | 57               |
|                                                          | mean (SD)  | -1.6 (1.2)  | -1.8 (1.3)  | -1.7 (1.2)       |
|                                                          | min, max   | -4.4, 1.6   | -4.3, 0.3   | -4.4, 1.6        |
| Weight Z-score                                           | N          | 37          | 20          | 57               |
|                                                          | mean (SD)  | -1.3 (1.1)  | -1.6 (1.0)  | -1.4 (1.0)       |
|                                                          | min, max   | -3.2, 0.8   | -4.2, -0.2  | -4.2, 0.8        |
| BMI Z-score                                              | N          | 34          | 20          | 54               |
|                                                          | mean (SD)  | -0.2 (0.8)  | -0.4 (1.1)  | -0.3 (0.9)       |
|                                                          | min, max   | -2.1, 1.0   | -2.6, 1.8   | -2.6, 1.8        |

**Supplemental Table 6. Total Follow-Up Time after Start of Study Medication by Treatment and Overall, Combined Studies.**

| Follow-Up Time (weeks) | MRX (N=39)          | PBO (N=18)          | Overall (N=57)      |
|------------------------|---------------------|---------------------|---------------------|
| Median (Q1, Q3)        | 184.7 (88.0, 234.4) | 191.4 (83.4, 264.1) | 184.7 (86.4, 246.1) |

Q1, Q3 = first and third quartiles, respectively.

**Supplemental Table 7. Responders Analyses at Week 48, Week 72 and End of Treatment (EOT) in Major Clinical Parameters, Combined Studies.**

| Variable                       | N (%) participants with change from baseline                             | Week 48 Multiple Imputation <sup>1</sup> (N=57) | Week 72 Observed Cases (N=41) <sup>3</sup> | EOT Observed Cases (N=45) <sup>4</sup> |
|--------------------------------|--------------------------------------------------------------------------|-------------------------------------------------|--------------------------------------------|----------------------------------------|
| ItchRO(Obs)                    | N                                                                        | 57                                              | 162                                        | 45                                     |
|                                | ≤ -1                                                                     | 41.8 (73.3)                                     | 15 (93.8)                                  | 35 (77.8)                              |
|                                | ≤ -2                                                                     | 23.2 (40.7)                                     | 8 (50.0)                                   | 25 (55.6)                              |
|                                | 0 ≤ score ≤ 1 at follow-up, regardless of score at baseline <sup>6</sup> | 24.5 (43.0)                                     | 10 (62.5)                                  | 25 (55.6)                              |
| Clinician Scratch Scale (CSS)  | N                                                                        | 57                                              | 40                                         | 45                                     |
|                                | ≤ -1                                                                     | 38.9 (68.2)                                     | 28 (70.0)                                  | 36 (80.0)                              |
|                                | ≤ -2                                                                     | 24.8 (43.5)                                     | 17 (42.5)                                  | 21 (46.7)                              |
|                                | ≤ -3                                                                     | 16.9 (29.6)                                     | 11 (27.5)                                  | 13 (28.9)                              |
|                                | ≤ -4                                                                     | 5.7 (10.0)                                      | 5 (12.5)                                   | 6 (13.3)                               |
| Serum Bile Acid (umol/L)       | N                                                                        | 57                                              | 37                                         | 45                                     |
|                                | ≤ -25%                                                                   | 32 (56.1)                                       | 24 (64.9)                                  | 28 (62.2)                              |
|                                | ≤ -50%                                                                   | 22.5 (39.5)                                     | 13 (35.1)                                  | 21 (46.7)                              |
| PedsQL Total - Parent          | N                                                                        | 57                                              | 30                                         | 44                                     |
|                                | ≥ +5                                                                     | 33.6 (58.9)                                     | 19 (63.3)                                  | 24 (54.5)                              |
|                                | ≥ +10                                                                    | 25.4 (44.6)                                     | 14 (46.7)                                  | 21 (47.7)                              |
| Multidimensional Fatigue Scale | N                                                                        | 57                                              | 25                                         | 39                                     |
|                                | ≥ +5                                                                     | 37.9 (66.5)                                     | 18 (72.0)                                  | 25 (64.1)                              |
|                                | ≥ +10                                                                    | 29.7 (52.1)                                     | 15 (60.0)                                  | 19 (48.7)                              |
| Family Impact Total Scale      | N                                                                        | 57                                              | 30                                         | 43                                     |
|                                | ≥ +5                                                                     | 34.4 (60.4)                                     | 19 (63.3)                                  | 26 (60.5)                              |
|                                | ≥ +10                                                                    | 31.7 (55.6)                                     | 18 (60.0)                                  | 25 (58.1)                              |
| Weight Z-Score                 | N                                                                        | 57                                              | 39                                         | 45                                     |

|                |                                                 |                                                    |                                               |                                              |
|----------------|-------------------------------------------------|----------------------------------------------------|-----------------------------------------------|----------------------------------------------|
|                | ≥ +0.3                                          | 21.1 (37.0)                                        | 13 (33.3)                                     | 19 (42.2)                                    |
| Variable       | N (%) participants<br>with change from baseline | Week 48 Multiple Imputation <sup>1</sup><br>(N=57) | Week 72 Observed Cases<br>(N=41) <sup>3</sup> | EOT<br>Observed Cases<br>(N=45) <sup>4</sup> |
| Height Z-Score | N                                               | 57                                                 | 39                                            | 45                                           |
|                | ≥ +0.3                                          | 25.9 (45.4)                                        | 15 (38.5)                                     | 19 (42.2)                                    |

<sup>1</sup>10 imputed datasets were generated using the multivariate normal distribution (MVN) method for continuous measures and the fully conditional specification (FCS) method for categorical methods. The multiple imputation model included all characteristics at weeks -13, 0, 2, 4, 8, 12, 24, 36, and 48, study (ITCH/IMAGINE II or IMAGO/IMAGINE), age at baseline (years), and sex.

<sup>2</sup>ItchRO was not collected in IMAGINE at week 72.

<sup>3</sup>Week 72 is the patient's drug exposure week. That is, when a patient had a treatment gap, this period is not included.

<sup>4</sup>For EOT analysis, only participants who have at least 48 weeks in IMAGINE or IMAGINE II are included. The EOT data was obtained as the last value that is before the date of last treatment dose + 7 days.

<sup>5</sup>Vitamin A Insufficiency: Retinol/RBP (molar ratio <0.8). Vitamin D Insufficiency: 25-Hydroxyvitamin D <20 ng/mL. Vitamin E Insufficiency: Tocopherol/lipids <0.8 mg/g. Vitamin K Insufficiency: INR > 1.2.

<sup>6</sup>Three participants in IMAGO have ItchRO(Obs) at baseline < 2 (1.5, 1.7, 1.9).

**Supplemental Table 8. Change from Baseline to Week 48 in Secondary Clinical Parameters, Combined Studies. Multiple Imputation.**

| Characteristics                    | Baseline <sup>1</sup> | Adjusted <sup>2</sup> Change from Baseline to Week 48 Multiple Imputation <sup>3</sup><br>(N=57) | p-value |
|------------------------------------|-----------------------|--------------------------------------------------------------------------------------------------|---------|
| Family Impact Total Scale          | 58.7 (47.2, 79.2)     | 10.06 (3.90, 16.22)                                                                              | 0.002   |
| Total Cholesterol (mg/dL)          | 309.5 [234.0, 443.0]  | -74.78 (-135.66, -13.91)                                                                         | 0.02    |
| AST (U/L)                          | 120.0 (76.0, 180.0)]  | 24.77 (5.62, 43.92)                                                                              | 0.01    |
| GGT (U/L)                          | 349.0 (196.0, 602.0)  | -67.62, 84.53                                                                                    | 0.83    |
| AST to platelet ratio index (APRI) | 0.9 (0.6, 1.9)        | 0.47 (-0.07, 1.01)                                                                               | 0.08    |
| Vitamin A (µg/dL)                  | 50.0 (38.0, 65.0)     | 0.91 (-4.17, 5.99)                                                                               | 0.72    |
| Vitamin D (ng/mL)                  | 30.9 (20.0, 36.5)     | -1.66 (-5.76, 2.44)                                                                              | 0.42    |
| Vitamin E (µg/mL)                  | 8.4 (4.1, 12.1)       | 0.20 (-1.19, 1.58)                                                                               | 0.78    |
| BMI Z-Score                        | -0.4 (-0.9, 0.4)      | -0.12 (-0.33, 0.09)                                                                              | 0.27    |

<sup>1</sup>Median [Q1, Q3], Q1, Q3 = first and third quartiles, respectively.

<sup>2</sup>Least square mean and 95% confidence interval and p-value based on separate linear mixed models (random intercept and slope for each subject) for each characteristic with dependent variable as the change from baseline controlling for study (ITCH/IMAGINE II or IMAGO/IMAGINE), week (0, 2, 4, 8, 12, 24, 36, 48), age at baseline, and baseline level of the dependent variable as covariates.

<sup>3</sup>10 imputed datasets were generated using the multivariate normal distribution (MVN) method for continuous measures and the fully conditional specification (FCS) method for categorical methods. The multiple imputation model included all characteristics at weeks -13, 0, 2, 4, 8, 12, 24, 36, and 48, study (ITCH/IMAGINE II or IMAGO/IMAGINE), age at baseline (years), and sex.

**Supplemental Table 9. Vitamin Status at Week 48, Week 72 and End of Treatment (EOT), Combined Studies.**

| Variable               | N (%) participants with     | Week 48 Multiple Imputation <sup>1</sup><br>(N=57) | Week 72 <sup>2</sup><br>Observed Cases<br>(N=41) | EOT <sup>3</sup><br>Observed Cases<br>(N=45) |
|------------------------|-----------------------------|----------------------------------------------------|--------------------------------------------------|----------------------------------------------|
| Vitamin A <sup>4</sup> | Sufficient at Baseline, N   | 50.4                                               | 30                                               | 37                                           |
|                        | Sufficiency                 | 44.7 (88.7)                                        | 28 (93.3)                                        | 29 (78.4)                                    |
|                        | Insufficiency               | 5.7 (11.3)                                         | 2 (6.7)                                          | 8 (21.6)                                     |
|                        | Insufficient at Baseline, N | 6.6                                                | 1                                                | 3                                            |
|                        | Sufficiency                 | 4.3 (65.2)                                         | 0 (0.0)                                          | 2 (66.7)                                     |
|                        | Insufficiency               | 2.3 (34.8)                                         | 1 (100.0)                                        | 1 (33.3)                                     |
| Vitamin D <sup>4</sup> | Sufficient at Baseline, N   | 43.3                                               | 27                                               | 34                                           |
|                        | Sufficiency                 | 31.5 (72.7)                                        | 23 (85.2)                                        | 29 (85.3)                                    |
|                        | Insufficiency               | 11.8 (27.3)                                        | 4 (14.8)                                         | 5 (14.7)                                     |
|                        | Insufficient at Baseline, N | 13.7                                               | 7                                                | 9                                            |
|                        | Sufficiency                 | 3.5 (25.5)                                         | 2 (28.6)                                         | 1 (11.1)                                     |
|                        | Insufficiency               | 10.2 (74.5)                                        | 5 (71.4)                                         | 8 (88.9)                                     |
| Vitamin E <sup>4</sup> | Sufficient at Baseline, N   | 33.6                                               | 25                                               | 29                                           |
|                        | Sufficiency                 | 30.4 (90.5)                                        | 24 (96.0)                                        | 28 (96.6)                                    |
|                        | Insufficiency               | 3.2 (9.5)                                          | 1 (4.0)                                          | 1 (3.4)                                      |
|                        | Insufficient at Baseline, N | 23.4                                               | 8                                                | 13                                           |
|                        | Sufficiency                 | 7.7 (32.9)                                         | 4 (50.0)                                         | 4 (30.8)                                     |
|                        | Insufficiency               | 15.7 (67.1)                                        | 4 (50.0)                                         | 9 (69.2)                                     |
| Vitamin K <sup>4</sup> | Sufficient at Baseline, N   | 49.6                                               | 34                                               | 39                                           |
|                        | Sufficiency                 | 45.5 (91.7)                                        | 33 (97.1)                                        | 32 (82.1)                                    |
|                        | Insufficiency               | 4.1 (8.3)                                          | 1 (2.9)                                          | 7 (17.9)                                     |
|                        | Insufficient at Baseline, N | 7.4                                                | 2                                                | 4                                            |
|                        | Sufficiency                 | 3.4 (45.9)                                         | 1 (50.0)                                         | 0 (0.0)                                      |
|                        | Insufficiency               | 4 (54.1)                                           | 1 (50.0)                                         | 4 (100.0)                                    |

---

<sup>1</sup>Ten imputed datasets were generated using the multivariate normal distribution (MVN) method for continuous measures and the fully conditional specification (FCS) method for categorical methods. The multiple imputation model included all characteristics at weeks - 13, 0, 2, 4, 8, 12, 24, 36, and 48, study (ITCH/IMAGINE II or IMAGO/IMAGINE), age at baseline (years), and sex.

<sup>2</sup>Week 72 is the patient's drug exposure week. That is, when a patient had a treatment gap, this period is not included.

<sup>3</sup>For EOT analysis, only participants who have at least 48 weeks in IMAGINE or IMAGINE II are included. The EOT data was obtained as the last value that is before the date of last treatment dose + 7 days.

<sup>4</sup>Vitamin A Insufficiency: Retinol/RBP (molar ratio <0.8). Vitamin D Insufficiency: 25-Hydroxyvitamin D <20 ng/mL. Vitamin E Insufficiency: Tocopherol/lipids <0.8 mg/g. Vitamin K Insufficiency: INR > 1.2.

**Supplemental Table 10. Change from to Week 48, Week 72 and End of Treatment (EOT) in Secondary Clinical Parameters, Combined Studies. Observed Cases.**

| Characteristics           | Statistics    | Change from Baseline to Week 48, Unadjusted, Observed Cases (N=45) | Change from Baseline to Week 72 <sup>1</sup> , Observed Cases (N=41) | Change from Baseline to EOT <sup>2</sup> , Observed Cases (N=45) |
|---------------------------|---------------|--------------------------------------------------------------------|----------------------------------------------------------------------|------------------------------------------------------------------|
| Family Impact Total Scale | N             | 41                                                                 | 30                                                                   | 43                                                               |
|                           | Mean (95% CI) | 11.25 (6.77, 15.73)                                                | 14.10 (8.35, 19.85)                                                  | 14.38 (8.90, 19.86)                                              |
| AST (U/L)                 | N             | 44                                                                 | 37                                                                   | 45                                                               |
|                           | Mean (95% CI) | 29.02 (10.49, 47.56)                                               | 33.32 (16.15, 50.50)                                                 | 24.91 (3.81, 46.01)                                              |
| GGT (U/L)                 | N             | 44                                                                 | 37                                                                   | 45                                                               |
|                           | Mean (95% CI) | 34.36 (-21.83, 90.56)                                              | 26.19, 141.00                                                        | 23.49 (-40.63, 87.61)                                            |
| APRI                      | N             | 42                                                                 | 36                                                                   | 45                                                               |
|                           | Mean (95% CI) | 0.41 (0.14, 0.67)                                                  | 0.58 (0.31, 0.86)                                                    | 0.71 (0.35, 1.06)                                                |
| Vitamin A (µg/dL)         | N             | 42                                                                 | 35                                                                   | 44                                                               |
|                           | Mean (95% CI) | 1.40 (-3.27, 6.08)                                                 | 3.24 (-1.29, 7.77)                                                   | -1.30 (-6.03, 3.42)                                              |
| Vitamin D (ng/mL)         | N             | 41                                                                 | 34                                                                   | 43                                                               |
|                           | Mean (95% CI) | -1.15 (-5.72, 3.42)                                                | -0.93 (-4.03, 2.18)                                                  | -1.53 (-5.96, 2.91)                                              |
| Vitamin E (µg/mL)         | N             | 42                                                                 | 35                                                                   | 44                                                               |
|                           | Mean (95% CI) | 0.07 (-0.82, 0.97)                                                 | 0.87 (0.08, 1.66)                                                    | 0.31 (-0.57, 1.18)                                               |
| BMI Z-Score               | N             | 44                                                                 | 39                                                                   | 45                                                               |
|                           | Mean (95% CI) | -0.08 (-0.29, 0.13)                                                | -0.06 (-0.29, 0.17)                                                  | -0.17 (-0.42, 0.09)                                              |

<sup>1</sup>Week 72 is observed week

<sup>2</sup>For EOT analysis, only participants who have at least 48 weeks in IMAGINE or IMAGINE II are included. The EOT data was obtained as the last value that is before the date of last treatment dose + 7 days.



**Supplemental Table 11. End of Treatment Effect on Various Outcomes by Stable Dosing Group after Week 48, Combined Studies.**

| Variable                                                                | Statistics      | Stable Dosing Group |                     |                       |                         |
|-------------------------------------------------------------------------|-----------------|---------------------|---------------------|-----------------------|-------------------------|
|                                                                         |                 | All                 | 140 mcg/kg/d        | 280 mcg/kg/d          | 560 mcg/kg/d            |
| ItchRO (Obs)                                                            | N               | 45                  | 6                   | 34                    | 5                       |
|                                                                         | Median (Q1, Q3) | -2.0 (-2.7, -1.1)   | -2.5 (-2.6, -1.7)   | -2.2 (-2.7, -1.1)     | -1.3 (-1.4, -0.4)       |
|                                                                         | Min, Max        | -3.6, 0.0           | -3.1, -0.3          | -3.6, 0.0             | -2.0, 0.0               |
| ItchRO (Obs) Responder, n (%) participants with change from baseline    | ≤ -1            | 35 (77.8%)          | 5 (83.3%)           | 27 (79.4%)            | 3 (60.0%)               |
|                                                                         | ≤ -2            | 25 (55.6%)          | 4 (66.7%)           | 20 (58.8%)            | 1 (20.0%)               |
| CSS                                                                     | N               | 45                  | 6                   | 34                    | 5                       |
|                                                                         | Median (Q1, Q3) | -1.0 (-3.0, -1.0)   | -1.0 (-2.0, -1.0)   | -1.0 (-3.0, -1.0)     | -2.0 (-3.0, -1.0)       |
|                                                                         | Min, Max        | -4.0, 2.0           | -4.0, 0.0           | -4.0, 2.0             | -3.0, -1.0              |
| CSS Responder, n (%) participants with change from baseline             | ≤ -1            | 36 (80.0%)          | 5 (83.3%)           | 26 (76.5%)            | 5 (100.0%)              |
|                                                                         | ≤ -2            | 21 (46.7%)          | 2 (33.3%)           | 16 (47.1%)            | 3 (60.0%)               |
|                                                                         | ≤ -3            | 13 (28.9%)          | 1 (16.7%)           | 10 (29.4%)            | 2 (40.0%)               |
|                                                                         | ≤ -4            | 6 (13.3%)           | 1 (16.7%)           | 5 (14.7%)             | 0 (0.0%)                |
| Serum Bile Acid (umol/L)                                                | N               | 45                  | 6                   | 34                    | 5                       |
|                                                                         | Median (Q1, Q3) | -52.9 (-126.9, -    | -12.4 (-40.4, 15.9) | -51.6 (-121.5, -15.0) | -145.3 (-297.2, -126.9) |
|                                                                         | Min, Max        | -304.4, 192.6       | -163.8, 60.2        | -260.2, 192.6         | -304.4, -98.2           |
| Serum Bile Acid Responder, n (%) participants with change from baseline | ≤ -25%          | 28 (62.2%)          | 2 (33.3%)           | 21 (61.8%)            | 5 (100.0%)              |
|                                                                         | ≤ -50%          | 21 (46.7%)          | 1 (16.7%)           | 16 (47.1%)            | 4 (80.0%)               |
| PedsQL Parent                                                           | N               | 44                  | 6                   | 33                    | 5                       |
|                                                                         | Median (Q1, Q3) | 7.2 (-1.7, 22.8)    | 3.4 (-8.7, 26.6)    | 12.0 (1.1, 22.8)      | 0.6 (-6.4, 3.3)         |
|                                                                         | Min, Max        | -41.9, 40.2         | -19.6, 40.2         | -17.9, 34.4           | -41.9, 22.8             |
| PedsQL Parent Responder, n (%) participants with change from baseline   | ≥ +5            | 24 (54.5%)          | 3 (50.0%)           | 20 (60.6%)            | 1 (20.0%)               |
|                                                                         | ≥ +10           | 21 (47.7%)          | 2 (33.3%)           | 18 (54.5%)            | 1 (20.0%)               |
| Multidimensional Fatigue                                                | N               | 39                  | 6                   | 28                    | 5                       |

| Variable                                                                         | Stable Dosing Group |                     |                    |                     |                     |
|----------------------------------------------------------------------------------|---------------------|---------------------|--------------------|---------------------|---------------------|
|                                                                                  | Statistics          | All                 | 140 mcg/kg/d       | 280 mcg/kg/d        | 560 mcg/kg/d        |
|                                                                                  | Median (Q1, Q3)     | 9.7 (1.4, 26.4)     | 5.6 (0.0, 30.6)    | 14.3 (3.5, 26.4)    | -15.3 (-16.7, 8.3)  |
|                                                                                  | Min, Max            | -45.8, 45.8         | -8.3, 45.8         | -22.2, 43.1         | -45.8, 30.6         |
| Multidimensional Fatigue Responder, n (%) participants with change from baseline | ≥ +5                | 25 (64.1%)          | 3 (50.0%)          | 20 (71.4%)          | 2 (40.0%)           |
|                                                                                  | ≥ +10               | 19 (48.7%)          | 2 (33.3%)          | 16 (57.1%)          | 1 (20.0%)           |
| Family Impact                                                                    | N                   | 43                  | 6                  | 32                  | 5                   |
|                                                                                  | Median (Q1, Q3)     | 11.2 (0.0, 24.3)    | 12.5 (-7.6, 16.7)  | 12.6 (0.0, 25.3)    | 2.1 (0.0, 24.3)     |
|                                                                                  | Min, Max            | -18.8, 67.4         | -11.8, 67.4        | -18.8, 52.1         | 0.0, 43.1           |
| Family Impact Responder, n (%) participants with change from baseline            | ≥ +5                | 26 (60.5%)          | 4 (66.7%)          | 20 (62.5%)          | 2 (40.0%)           |
|                                                                                  | ≥ +10               | 25 (58.1%)          | 4 (66.7%)          | 19 (59.4%)          | 2 (40.0%)           |
| Total Bilirubin (mg/dL)                                                          | N                   | 45                  | 6                  | 34                  | 5                   |
|                                                                                  | Median (Q1, Q3)     | 0.1 (-0.5, 0.3)     | -0.0 (-3.2, 0.1)   | 0.1 (-0.5, 0.3)     | 0.0 (-0.1, 0.2)     |
|                                                                                  | Min, Max            | -9.7, 13.9          | -5.1, 0.2          | -4.1, 7.9           | -9.7, 13.9          |
| Total Cholesterol (mg/dL)                                                        | N                   | 43                  | 6                  | 33                  | 4                   |
|                                                                                  | Median (Q1, Q3)     | -26.0 (-91.0, 3.0)  | -46.0 (-111.0,     | -26.0 (-88.0, 2.0)  | -29.0 (-90.5, -1.5) |
|                                                                                  | Min, Max            | -538.0, 111.0       | -538.0, 27.0       | -427.0, 111.0       | -137.0, 11.0        |
| ALT (U/L)                                                                        | N                   | 45                  | 6                  | 34                  | 5                   |
|                                                                                  | Median (Q1, Q3)     | 26.0 (-1.0, 58.0)   | 6.0 (-15.0, 15.0)  | 26.5 (5.0, 44.0)    | 59.0 (58.0, 60.0)   |
|                                                                                  | Min, Max            | -160.0, 396.0       | -109.0, 58.0       | -74.0, 396.0        | -160.0, 244.0       |
| AST (U/L)                                                                        | N                   | 45                  | 6                  | 34                  | 5                   |
|                                                                                  | Median (Q1, Q3)     | 12.0 (-10.0, 36.0)  | -2.0 (-38.0, 14.0) | 10.0 (-8.0, 45.0)   | 29.0 (19.0, 36.0)   |
|                                                                                  | Min, Max            | -141.0, 201.0       | -106.0, 85.0       | -74.0, 201.0        | -141.0, 113.0       |
| GGT (U/L)                                                                        | N                   | 45                  | 6                  | 34                  | 5                   |
|                                                                                  | Median (Q1, Q3)     | 31.0 (-89.0, 172.0) | -34.0 (-180.0,     | 36.5 (-62.0, 194.0) | 57.0 (-333.0, 95.0) |
|                                                                                  | Min, Max            | -421.0, 666.0       | -313.0, 219.0      | -421.0, 666.0       | -356.0, 345.0       |
| Albumin (g/dL)                                                                   | N                   | 45                  | 6                  | 34                  | 5                   |
|                                                                                  | Median (Q1, Q3)     | 0.0 (-0.4, 0.2)     | -0.3 (-0.7, 0.1)   | 0.0 (-0.2, 0.2)     | 0.0 (-0.7, 0.2)     |

| Variable                                                       | Stable Dosing Group         |                     |                     |                      |                      |
|----------------------------------------------------------------|-----------------------------|---------------------|---------------------|----------------------|----------------------|
|                                                                | Statistics                  | All                 | 140 mcg/kg/d        | 280 mcg/kg/d         | 560 mcg/kg/d         |
|                                                                | Min, Max                    | -1.3, 0.5           | -1.2, 0.2           | -0.6, 0.5            | -1.3, 0.3            |
| Platelet (10 <sup>3</sup> /uL)                                 | N                           | 45                  | 6                   | 34                   | 5                    |
|                                                                | Median (Q1, Q3)             | -38.0 (-99.0, -4.0) | -14.0 (-55.0, 14.0) | -40.0 (-99.0, -18.0) | -22.0 (-210.0, -4.0) |
|                                                                | Min, Max                    | -336.0, 83.0        | -326.0, 24.0        | -253.0, 83.0         | -336.0, 71.0         |
| AST to Platelet Ratio Index (APRI)                             | N                           | 45                  | 6                   | 34                   | 5                    |
|                                                                | Median (Q1, Q3)             | 0.3 (0.1, 0.9)      | -0.1 (-0.6, 0.7)    | 0.3 (0.1, 0.9)       | 0.3 (0.1, 1.1)       |
|                                                                | Min, Max                    | -0.8, 4.7           | -0.8, 2.7           | -0.6, 4.7            | -0.0, 3.0            |
| Vitamin A (ug/dL)                                              | N                           | 44                  | 6                   | 33                   | 5                    |
|                                                                | Median (Q1, Q3)             | -2.9 (-8.3, 8.8)    | -1.0 (-27.0, 9.0)   | -3.0 (-8.0, 5.0)     | 8.9 (7.2, 15.5)      |
|                                                                | Min, Max                    | -42.0, 34.4         | -42.0, 17.0         | -33.0, 34.4          | -18.9, 28.3          |
| Vitamin A Insufficiency <sup>2</sup> , n (%) participants with | Sufficient at Baseline, N   | 37                  | 4                   | 28                   | 5                    |
|                                                                | Sufficiency                 | 29 (78.4%)          | 2 (50.0%)           | 22 (78.6%)           | 5 (100.0%)           |
|                                                                | Insufficiency               | 8 (21.6%)           | 2 (50.0%)           | 6 (21.4%)            | 0 (0.0%)             |
|                                                                | Insufficient at Baseline, N | 3                   | 0                   | 3                    | 0                    |
|                                                                | Sufficiency                 | 2 (66.7%)           | 0                   | 2 (66.7%)            | 0                    |
|                                                                | Insufficiency               | 1 (33.3%)           | 0                   | 1 (33.3%)            | 0                    |
| Vitamin D (ng/mL)                                              | N                           | 43                  | 6                   | 33                   | 4                    |
|                                                                | Median (Q1, Q3)             | -5.0 (-10.8, 5.0)   | -10.5 (-13.5, 3.0)  | -2.0 (-9.0, 6.9)     | -7.8 (-13.6, -5.0)   |
|                                                                | Min, Max                    | -26.4, 52.0         | -18.0, 14.0         | -26.4, 52.0          | -19.2, -2.4          |
| Vitamin D Insufficiency <sup>2</sup> , n (%) participants with | Sufficient at Baseline, N   | 34                  | 4                   | 26                   | 4                    |
|                                                                | Sufficiency                 | 29 (85.3%)          | 4 (100.0%)          | 22 (84.6%)           | 3 (75.0%)            |
|                                                                | Insufficiency               | 5 (14.7%)           | 0 (0.0%)            | 4 (15.4%)            | 1 (25.0%)            |
|                                                                | Insufficient at Baseline, N | 9                   | 2                   | 7                    | 0                    |

| Variable                                                       | Stable Dosing Group         |                 |                |                 |                 |
|----------------------------------------------------------------|-----------------------------|-----------------|----------------|-----------------|-----------------|
|                                                                | Statistics                  | All             | 140 mcg/kg/d   | 280 mcg/kg/d    | 560 mcg/kg/d    |
|                                                                | Sufficiency                 | 1 (11.1%)       | 0 (0.0%)       | 1 (14.3%)       | 0               |
|                                                                | Insufficiency               | 8 (88.9%)       | 2 (100.0%)     | 6 (85.7%)       | 0               |
| Vitamin E (mg/L)                                               | N                           | 44              | 6              | 33              | 5               |
|                                                                | Median (Q1, Q3)             | 0.8 (-1.3, 2.4) | 1.5 (0.0, 2.4) | 0.8 (-0.7, 1.3) | 3.4 (-3.9, 4.0) |
|                                                                | Min, Max                    | -7.1, 6.8       | -4.2, 2.5      | -7.1, 6.8       | -4.0, 5.1       |
| Vitamin E Insufficiency <sup>2</sup> , n (%) participants with | Sufficient at Baseline, N   | 29              | 3              | 23              | 3               |
|                                                                | Sufficiency                 | 28 (96.6%)      | 3 (100.0%)     | 22 (95.7%)      | 3 (100.0%)      |
|                                                                | Insufficiency               | 1 (3.4%)        | 0 (0.0%)       | 1 (4.3%)        | 0 (0.0%)        |
|                                                                | Insufficient at Baseline, N | 13              | 3              | 9               | 1               |
|                                                                | Sufficiency                 | 4 (30.8%)       | 1 (33.3%)      | 2 (22.2%)       | 1 (100.0%)      |
|                                                                | Insufficiency               | 9 (69.2%)       | 2 (66.7%)      | 7 (77.8%)       | 0 (0.0%)        |
| Vitamin K Insufficiency <sup>2</sup> , n (%) participants with | Sufficient at Baseline, N   | 39              | 5              | 30              | 4               |
|                                                                | Sufficiency                 | 32 (82.1%)      | 3 (60.0%)      | 25 (83.3%)      | 4 (100.0%)      |
|                                                                | Insufficiency               | 7 (17.9%)       | 2 (40.0%)      | 5 (16.7%)       | 0 (0.0%)        |
|                                                                | Insufficient at Baseline, N | 4               | 1              | 2               | 1               |
|                                                                | Sufficiency                 | 0 (0.0%)        | 0 (0.0%)       | 0 (0.0%)        | 0 (0.0%)        |
|                                                                | Insufficiency               | 4 (100.0%)      | 1 (100.0%)     | 2 (100.0%)      | 1 (100.0%)      |
| Any Vitamin Insufficiency, n (%) participants with             | Sufficient at Baseline, N   | 25              | 3              | 19              | 3               |
|                                                                | Sufficiency                 | 15 (60.0%)      | 2 (66.7%)      | 11 (57.9%)      | 2 (66.7%)       |
|                                                                | Insufficiency               | 10 (40.0%)      | 1 (33.3%)      | 8 (42.1%)       | 1 (33.3%)       |
|                                                                | Insufficient at Baseline, N | 17              | 3              | 13              | 1               |
|                                                                | Sufficiency                 | 2 (11.8%)       | 0 (0.0%)       | 2 (15.4%)       | 0 (0.0%)        |
|                                                                | Insufficiency               | 15 (88.2%)      | 3 (100.0%)     | 11 (84.6%)      | 1 (100.0%)      |

| Variable                                                                  | Statistics      | Stable Dosing Group |                  |                  |                 |
|---------------------------------------------------------------------------|-----------------|---------------------|------------------|------------------|-----------------|
|                                                                           |                 | All                 | 140 mcg/kg/d     | 280 mcg/kg/d     | 560 mcg/kg/d    |
| Height Z-score                                                            | N               | 45                  | 6                | 34               | 5               |
|                                                                           | Median (Q1, Q3) | 0.2 (-0.1, 0.7)     | 0.2 (-0.4, 0.4)  | 0.2 (-0.1, 0.8)  | 0.5 (0.5, 1.1)  |
|                                                                           | Min, Max        | -1.1, 1.9           | -0.5, 0.6        | -0.7, 1.9        | -1.1, 1.8       |
| Height Z-score Responder, n (%)<br>participants with change from baseline | ≥ +0.3          | 19 (42.2%)          | 2 (33.3%)        | 13 (38.2%)       | 4 (80.0%)       |
| Weight Z-score                                                            | N               | 45                  | 6                | 34               | 5               |
|                                                                           | Median (Q1, Q3) | 0.1 (-0.6, 0.5)     | -0.2 (-1.2, 0.5) | 0.0 (-0.4, 0.8)  | 0.5 (0.3, 1.4)  |
|                                                                           | Min, Max        | -1.5, 1.7           | -1.2, 0.5        | -1.3, 1.7        | -1.5, 1.5       |
| Weight Z-score Responder, n (%)<br>participants with change from baseline | ≥ +0.3          | 19 (42.2%)          | 3 (50.0%)        | 12 (35.3%)       | 4 (80.0%)       |
| BMI Z-score                                                               | N               | 45                  | 6                | 34               | 5               |
|                                                                           | Median (Q1, Q3) | -0.2 (-0.8, 0.4)    | -0.2 (-1.2, 0.3) | -0.3 (-0.8, 0.4) | 0.4 (-0.3, 0.5) |
|                                                                           | Min, Max        | -2.1, 2.2           | -2.1, 0.3        | -1.4, 2.2        | -1.3, 0.7       |
| BMI Z-score Responder, n (%)<br>participants with change from baseline    | ≥ +0.3          | 13 (28.9%)          | 1 (16.7%)        | 9 (26.5%)        | 3 (60.0%)       |

<sup>1</sup>IMAGINE subject 001005 had stable dose switching between 420 mcg/kg/d and 560 mcg/kg/d. This subject was combined into group 560 mcg/kg/d.

<sup>2</sup>Vitamin A Insufficiency: Retinol/RBP (molar ratio <0.8). Vitamin D Insufficiency: 25-Hydroxyvitamin D <20 ng/mL. Vitamin E Insufficiency: Tocopherol/lipids <0.8 mg/g. Vitamin K Insufficiency: INR > 1.2.

**Supplemental Table 12. Treatment-Emergent Gastrointestinal Adverse Events by Treatment, Combined Studies.**

| Characteristic                                   | ITCH/IMAGO |           | IMAGINE/IMAGINE II |           | Combined IMAGINE/ IMAGINE II |
|--------------------------------------------------|------------|-----------|--------------------|-----------|------------------------------|
|                                                  | MRX        | PBO       | MRX-MRX            | PBO-MRX   |                              |
| N                                                | 39         | 18        | 37                 | 16        | 53                           |
| # of AEs                                         | 60         | 26        | 165                | 66        | 231                          |
| Mean # of AEs per subject                        | 1.5        | 1.4       | 4.5                | 4.1       | 4.4                          |
| AE Rate (per person-year of treatment follow-up) | 5.4        | 5.4       | 1.6                | 1.5       | 1.6                          |
| # (%) of Participants with > 1 AE <sup>1</sup>   | 26 (66.7)  | 11 (61.1) | 29 (78.4)          | 13 (81.3) | 42 (80.8)                    |
| # (%) of AEs By Severity                         |            |           |                    |           |                              |
| Mild                                             | 53 (88.3)  | 17 (65.4) | 155 (93.9)         | 54 (81.8) | 209 (90.5)                   |
| Moderate                                         | 6 (10)     | 8 (30.8)  | 6 (3.6)            | 10 (15.2) | 16 (6.9)                     |
| Severe                                           | 1 (1.7)    | 1 (3.8)   | 4 (2.4)            | 2 (3)     | 6 (2.6)                      |

<sup>1</sup>If a participant started an AE in ITCH or IMAGO that continued during the extension period, the AE is counted in the ITCH or IMAGO study only. All AEs in extension studies are included, even those after 48 weeks.

Treatment-emergent adverse events are AEs where the start of the event is (a) on or after the first dose date, and (b) within 14 days of the last dose date.

Gastrointestinal AEs are defined by MedDRA Preferred Term = "Gastrointestinal disorders".

Treatment follow-up is no. of days from from first tx date to (last dose date + 14 days) or end of participation whichever is earlier, excluding days on drug holiday (treatment gap).

None of the GI AEs started during the drug holiday (treatment gap).

**Supplemental Table 13. Listing of Treatment-Emergent SAEs, Combined Studies.**

| Treatment <sup>1</sup> | Dose at time of SAE Onset | ID # | SAE Description (Verbatim Term)                                           | Days from Start of Study Medication* | SAE Duration (days) | Severity Grade <sup>2</sup> | Study Drug Action Taken |
|------------------------|---------------------------|------|---------------------------------------------------------------------------|--------------------------------------|---------------------|-----------------------------|-------------------------|
| MRX-MRX                | 70                        | 13   | Vomiting                                                                  | 68                                   | 4                   | Severe                      | Drug Interrupted        |
| MRX-MRX                | 280                       | 3    | Prolongation Of Hospitalization Due To Bleeding From Ears                 | 555                                  | 2                   | Mild                        | Dose Not Changed        |
| MRX-MRX                | 280                       | 6    | Hospital Admission For Reinsertion Of Cholecystostomy Button              | 175                                  | 3                   | Mild                        | Dose Not Changed        |
| MRX-MRX                | 280                       | 6    | Hospital Admission For Reinsertion Of Cholecystostomy Button              | 208                                  | 2                   | Mild                        | Dose Not Changed        |
| MRX-MRX                | 280                       | 6    | Hospital Admission For Fracture Of Right Forearm                          | 463                                  | 2                   | Moderate                    | Dose Not Changed        |
| MRX-MRX                | 280                       | 10   | Hospital Admission For Dental Procedure Complicated By Prolonged Bleeding | 265                                  | 2                   | Mild                        | Dose Not Changed        |
| MRX-MRX                | 280                       | 18   | Reduced Gastrointestinal Stoma Output Hospital Admission                  | 88                                   | 196                 | Moderate                    | Not Applicable          |
| MRX-MRX                |                           | 18   | Vomiting                                                                  | 158                                  | 3                   | Mild                        | Dose Not Changed        |
| MRX-MRX                |                           | 18   | Dehydration                                                               | 158                                  | 3                   | Mild                        | Dose Not Changed        |
| MRX-MRX                | 280                       | 14   | Nose Bleed                                                                | 1309                                 | 2                   | Severe                      | Dose Not Changed        |

| Treatment <sup>1</sup> | Dose at time of SAE Onset | ID # | SAE Description (Verbatim Term)                                 | Days from Start of Study Medication* | SAE Duration (days) | Severity Grade <sup>2</sup> | Study Drug Action Taken |
|------------------------|---------------------------|------|-----------------------------------------------------------------|--------------------------------------|---------------------|-----------------------------|-------------------------|
| MRX-MRX                |                           | 40   | End Stage Liver Disease                                         | 1273                                 | 1                   | Severe                      | Dose Not Changed        |
| MRX-MRX                | 140                       | 52   | Nutrition And Vitamin Deficiencies                              | 813                                  | 7                   | Moderate                    | Dose Not Changed        |
| MRX-MRX                | 140                       | 52   | Fungal Infection                                                | 866                                  | 19                  | Moderate                    | Dose Not Changed        |
| MRX-MRX                | 280                       | 54   | Hepatobiliary Disorders - Other, Specify (Hepatitis-Autoimmune) | 939                                  |                     | Severe                      | Drug Withdrawn          |
| PBO-MRX                | 70                        | 1    | Hypoxia                                                         | 114                                  | 4                   | Severe                      | Dose Not Changed        |
| PBO-MRX                | 280                       | 1    | Postoperative Pericardial Effusion                              | 292                                  | 9                   | Moderate                    | Dose Not Changed        |
| PBO-MRX                | 280                       | 1    | Febrile Episode                                                 | 344                                  | 2                   | Mild                        | Dose Not Changed        |
| PBO-MRX                | 280                       | 1    | Hypoxia                                                         | 344                                  | 2                   | Mild                        | Dose Not Changed        |
| PBO-MRX                | 280                       | 1    | High INR                                                        | 292                                  | 9                   | Moderate                    | Dose Not Changed        |
| PBO-MRX                | 280                       | 1    | Hospital Admission For Flare Up Of Bronchitis                   | 1494                                 | 4                   | Mild                        | Dose Not Changed        |
| PBO-MRX                | 560                       | 1    | Gastrointestinal Bleeding                                       | 1781                                 | 4                   | Moderate                    | Drug Interrupted        |
| PBO-MRX                | 560                       | 1    | Gastrointestinal Infection                                      | 1899                                 | 3                   | Moderate                    | Dose Not Changed        |
| PBO-MRX                | 560                       | 1    | Fracture Of Left Proximal Humerus                               | 2162                                 | 60                  | Moderate                    | Dose Not Changed        |



| Treatment <sup>1</sup> | Dose at time of SAE Onset | ID # | SAE Description (Verbatim Term)                      | Days from Start of Study Medication* | SAE Duration (days) | Severity Grade <sup>2</sup> | Study Drug Action Taken |
|------------------------|---------------------------|------|------------------------------------------------------|--------------------------------------|---------------------|-----------------------------|-------------------------|
| PBO-MRX                | 560                       | 1    | Pathological Fracture Of Right Femur (While Walking) | 2169                                 | 53                  | Moderate                    | Dose Not Changed        |
| PBO-MRX                | 560                       | 1    | Post Procedure Complication – Pulmonary Hemorrhage   | 1771                                 | 1                   | Severe                      | Dose Not Changed        |
| PBO-MRX                | 560                       | 1    | Post Procedure Complication Bradycardia              | 1771                                 | 1                   | Moderate                    | Dose Not Changed        |
| PBO-MRX                | 560                       | 1    | Post Procedure Complication – Hypotension            | 1771                                 | 1                   | Severe                      | Dose Not Changed        |
| PBO-MRX                | 560                       | 1    | Hospital Admission For Chest Infection               | 2343                                 | 5                   | Mild                        | Dose Not Changed        |
| PBO-MRX                | 560                       | 1    | Hospital Admission For Chest Infection               | 2355                                 | 13                  | Moderate                    | Dose Not Changed        |
| PBO-MRX                | 560                       | 1    | Hospital Admission For Right Heart Failure           | 2355                                 | 13                  | Moderate                    | Dose Not Changed        |
| PBO-MRX                | 280                       | 5    | Raised ALT                                           | 497                                  | .                   | Moderate                    | Drug Withdrawn          |
| PBO-MRX                | 70                        | 23   | Hematochezia                                         | 178                                  | 4                   | Severe                      | Drug Withdrawn          |
| PBO-MRX                | 70                        | 23   | Anemia                                               | 178                                  | 4                   | Severe                      | Drug Withdrawn          |

|         |     |    |             |      |   |          |                  |
|---------|-----|----|-------------|------|---|----------|------------------|
| PBO-MRX | 140 | 49 | Hematemesis | 1787 | 3 | Moderate | Dose Not Changed |
|---------|-----|----|-------------|------|---|----------|------------------|

Note: Adverse events coded using MedDRA version 16.0 (March 2013). In determining treatment-emergent AEs and study day, partial dates were imputed based on the SAP. Treatment-emergent adverse events are AEs where the start of the event is (a) on or after the first dose date, and (b) within 14 days of the last dose date.

<sup>1</sup>Treatment group is designated according to the randomized treatment group into which the participant was randomized in the ITCH or IMAGO study and if the SAE occurred in the extension study, -MRX, is appended.

<sup>2</sup>Adverse event severity grades are reported according to the Common Terminology Criteria for Adverse Events (CTCAE) Version 4.0. If the CTCAE does not have a grading for a particular adverse event, the severity of the event is reported by the investigator as mild, moderate, or severe.

\*Time since start of study medication includes any study drug interruption due to Amendment #4 implementation delays and adverse events; subjects designated with an asterisk had an interruption due to Amendment #4 implementation delays.

**Supplemental Table 14. Proportion of Subjects with Treatment-Emergent Adverse Events Causing Discontinuation by Treatment, Combined Studies.**

| Characteristic                                         | ITCH/IMAGO |         | IMAGINE II/IMAGINE |         |
|--------------------------------------------------------|------------|---------|--------------------|---------|
|                                                        | MRX        | PBO     | MRX-MRX            | PBO-MRX |
| N                                                      | 39         | 18      | 37                 | 16      |
| # of AEs                                               | 1          | 1       | 5                  | 3       |
| Total Participants With Events Causing Discontinuation | 1          | 1       | 5                  | 2       |
| System Organ Class                                     |            |         |                    |         |
| Preferred Term                                         |            |         |                    |         |
| Blood and lymphatic system disorders                   |            |         |                    |         |
| Anemias nonhemolytic and marrow depression, n (%)      | 0 (0.0)    | 0 (0.0) | 0 (0.0)            | 1 (6.2) |
| Hepatobiliary disorders                                |            |         |                    |         |
| Hepatic and hepatobiliary disorders, n (%)             | 0 (0.0)    | 0 (0.0) | 1 (2.7)            | 0 (0.0) |
| Gastrointestinal disorders                             |            |         |                    |         |
| Gastrointestinal hemorrhages NEC, n (%)                | 0 (0.0)    | 0 (0.0) | 0 (0.0)            | 1 (6.2) |
| Investigations                                         |            |         |                    |         |
| Hepatobiliary investigations, n (%)                    | 1 (2.5)    | 0 (0.0) | 4 (10.8)           | 1 (6.2) |
| Psychiatric disorders                                  |            |         |                    |         |
| Psychiatric and behavioral symptoms NEC, n (%)         | 0 (0.0)    | 1 (5.6) | 0 (0.0)            | 0 (0.0) |
| % = n/N*100                                            |            |         |                    |         |
| NEC = not elsewhere classified                         |            |         |                    |         |

**Supplemental Table 15. Listing of Treatment-Emergent Adverse Events Causing Discontinuation by Treatment, Combined Studies.**

| Treatment <sup>1</sup> | Dose at time of AE Onset | ID # | AE Description (Verbatim Term) | Days from Start of Study Medication* | AE Duration (days) | Serious Event? | Severity Grade <sup>2</sup> |
|------------------------|--------------------------|------|--------------------------------|--------------------------------------|--------------------|----------------|-----------------------------|
| MRX                    |                          | 21   | Increased ALT                  | 3                                    |                    | N              | Moderate                    |
| PBO-MRX                | 70                       | 23   | Hematochezia                   | 178                                  | 4                  | Y              | Severe                      |
| PBO-MRX                | 70                       | 23   | Anemia                         | 178                                  | 4                  | Y              | Severe                      |
| MRX-MRX                | 140                      | 31   | Increased ALT                  | 164                                  | 15                 | N              | Severe                      |
| MRX-MRX                | 280                      | 40   | Elevated Bilirubin             | 1224                                 | 50                 | N              | Mild                        |
| MRX-MRX                | 280                      | 45   | Increased ALT                  | 890                                  |                    | N              | Severe                      |
| MRX-MRX                | 280                      | 47   | Increased ALT                  | 266                                  | 28                 | N              | Moderate                    |
| MRX-MRX                | 280                      | 54   | Hepatitis Autoimmune           | 939                                  |                    | Y              | Severe                      |
| PBO-MRX                | 280                      | 5    | Increased ALT                  | 497                                  |                    | Y              | Moderate                    |
| PBO                    | 70                       | 16   | Behavioral Changes             | 18                                   | 16                 | N              | Moderate                    |

Note: Adverse events coded using MedDRA version 16.0 (March 2013). In determining treatment-emergent AEs and study day, partial dates were imputed based on the SAP.

Treatment-emergent adverse events are AEs where the start of the event is (a) on or after the first dose date, and (b) within 14 days of the last dose date.

<sup>1</sup>Treatment group is designated according to the randomized treatment group into which the participant was randomized in the ITCH or IMAGO study and if the AE occurred in the extension study, -MRX, is appended.

<sup>2</sup>Adverse event severity grades are reported according to the Common Terminology Criteria for Adverse Events (CTCAE) Version 4.0. If the CTCAE does not have a grading for a particular adverse event, the severity of the event is reported by the investigator as mild, moderate, or severe.

**Supplemental Table 16. Listing of Peak ALT/Peak TB and corresponding TB/ALT, CSS, and ItchRO(Obs) for Subjects with Treatment-Emergent Adverse Events Causing Discontinuation, Combined Studies.**

| Treatment | ID # | AE Description       | Days from start of medication | hDISH Peak ALT    |            |            |               |                       | hDISH Peak TB    |            |             |               |                       |
|-----------|------|----------------------|-------------------------------|-------------------|------------|------------|---------------|-----------------------|------------------|------------|-------------|---------------|-----------------------|
|           |      |                      |                               | Baseline/peak ALT | study week | corresp TB | change in CSS | change in ItchRO(Obs) | Baseline/peak TB | study week | corresp ALT | change in CSS | change in ItchRO(Obs) |
| PBO       | 16   | Behavioral           | 18                            | 65/NA             | NA         | NA         | NA            | NA                    | 0/3/NA           | NA         | NA          | NA            | NA                    |
| MRX       | 21   | Increased ALT        | 3                             | 105/NA            | NA         | NA         | NA            | NA                    | 0.6/NA           | NA         | NA          | NA            | NA                    |
| PBO-MRX   | 23   | Hematochezia         | 178                           | 322/203           | 2          | 19.1       | 0             | -1                    | 20.1/19.1        | 2          | 203         | 0             | -1                    |
|           |      | Anemia               | 178                           | 322/203           | 2          | 19.1       | 0             | -1                    | 20.1/19.1        | 2          | 203         | 0             | -1                    |
| PBO-MRX   | 5    | Increased ALT        | 497                           | 78/316            | 48         | 2.2        | -2            | -2.7                  | 2.1/2.5          | 36         | 234         | -2            | -2.7                  |
| MRX-MRX   | 31   | Increased ALT        | 164                           | 66/263            | -5         | 0.7        | -2            | -0.3                  | 1.6/1.1          | -11        | 119         | 0             | 0                     |
| MRX-MRX   | 40   | Increased TB         | 1224                          | 189/246           | -11        | 8          | -1            | -1.3                  | 7.2/15.1         | 156        | 216         | -1            | -2.9                  |
| MRX-MRX   | 45   | Increased ALT        | 890                           | 150/546           | 108        | 1.2        | -1            | -2.3                  | 0.9/1.3          | -11        | 128         | -2            | -0.3                  |
| MRX-MRX   | 47   | Increased ALT        | 266                           | 122/275           | 24         | 1.3        | 0             | -2                    | 2.5/2            | -11        | 234         | -2            | -0.9                  |
| MRX-MRX   | 54   | Autoimmune hepatitis | 939                           | 40/219            | 36         | 0.9        | -4            | -3.3                  | 0.9/1.1          | 48         | 82          | -4            | -2                    |

**Supplemental Table 17. Incidence of Enhanced Monitoring and Stopping Guidelines for ALT and Total Bilirubin (TB), Combined Studies.**

| Cumulative incidence through each time point                                    | Week 48   | Week 72   | EOT1      |
|---------------------------------------------------------------------------------|-----------|-----------|-----------|
|                                                                                 | N=57      | N=57      | N=57      |
| Number and % of participants who met enhanced monitoring criteria for ALT       | 7 (12.3)  | 9 (15.8)  | 15 (26.3) |
| Number and % of participants who met enhanced monitoring criteria for TB        | 8 (14.0)  | 9 (15.8)  | 9 (15.8)  |
| Number and % of participants who met enhanced monitoring criteria for ALT or TB | 15 (26.3) | 18 (31.6) | 24 (42.1) |
| Number and % of participants who met EARLY STOPPING criteria for ALT            | 1 (1.8)   | 1 (1.8)   | 1 (1.8)   |
| Number and % of participants who met EARLY STOPPING criteria for TB             | 1 (1.8)   | 1 (1.8)   | 2 (3.5)   |
| Number and % of participants who met EARLY STOPPING criteria for ALT or TB      | 2 (3.5)   | 2 (3.5)   | 3 (5.3)   |

<sup>1</sup>The EOT data was obtained as the last value that is on or before the date of last treatment dose + 7 days.
